# Supplementary material for: Lauryl-NrTP6 lipopeptide self-assembled nanorods for nuclear-targeted delivery of doxorubicin
Source: Royal Society of Chemistry journal article supplement (doi:10.1039/d4nr04068f), 2025-01-01
Supplement: d4nr04068f1.pdf [file d4nr04068f1.pdf]

**Supporting info:**

**Lauryl-NrTP6 lipopeptide self-assembled nanorods for nuclear target delivery of doxorubicin.**

**Amanda Phugula<sup>1,2,3#</sup>, Sofia Zuffi<sup>3,4#</sup>, Sunisa Thongsom<sup>3#</sup>, Paolo Di Gianvincenzo<sup>3</sup>, Santiago Gimenez Reyes<sup>3,5</sup>, Ana Beatriz Caribé dos Santos Valle<sup>3,6</sup>, Frederico Pittella<sup>6</sup>, Fernando Albericio<sup>1,7</sup>, Beatriz G. de la Torre<sup>2</sup>, Sergio E. Moya<sup>3</sup>**

1. Peptide Science Laboratory, School of Chemistry and Physics, University of KwaZulu-Natal, Durban 4001, South Africa

2. School of Laboratory Medicine and Medical Sciences, College of Health Sciences, University of KwaZulu-Natal, Durban 4001, South Africa

3. Soft Matter Nanotechnology, Center for Cooperative Research in Biomaterials (CIC biomaGUNE), Basque Research and Technology Alliance (BRTA), Paseo de Miramon 194, 20014, Donostia-San Sebastián, Spain.

4. Molecular Oncology Laboratory, IIS BioGipuzkoa, Pº Dr. Beguiristain s/n 20014 San Sebastián Gipuzkoa, Spain

5. Instituto de Física del Sur (IFISUR-CONICET), Av. Alem 1253, Bahía Blanca 8000, Argentina,

6. Laboratório de Desenvolvimento de Sistemas Nanoestruturados, Faculdade de Farmácia, Universidade Federal de Juiz de Fora, Rua José Lourenço Kelmer, 36036-900, Juiz de Fora, MG, Brasil

7. CIBER-BBN and Department of Organic Chemistry, University of Barcelona, Barcelona 08001, Spain

# These authors contributed equally.

\* Corresponding authors: Sergio E. Moya [smoya@cicbiomagune.es](mailto:smoya@cicbiomagune.es)

Beatriz G. de la Torre [garciadelatorreb@ukzn.ac.za](mailto:garciadelatorreb@ukzn.ac.za)

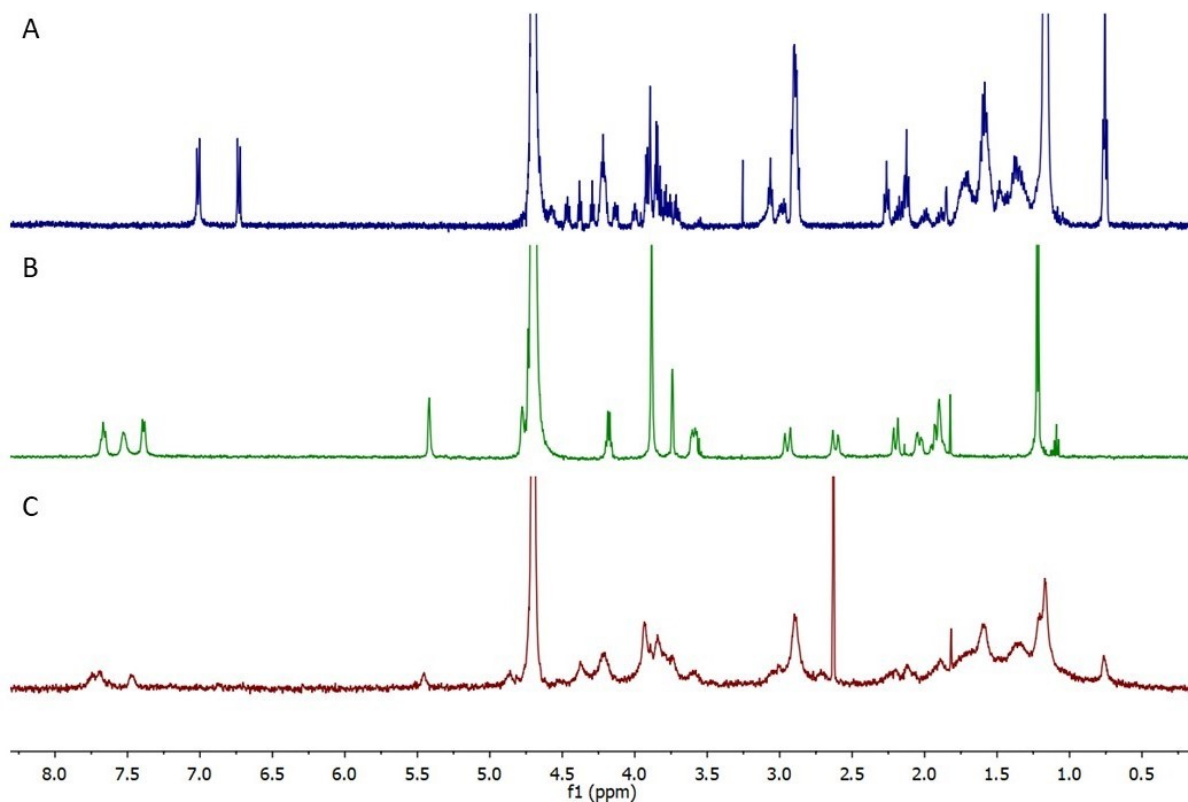

Figure S1. <sup>1</sup>H NMR experiments (D<sub>2</sub>O). A) Lipopeptide, B) Doxorubicin and C) LP-DX

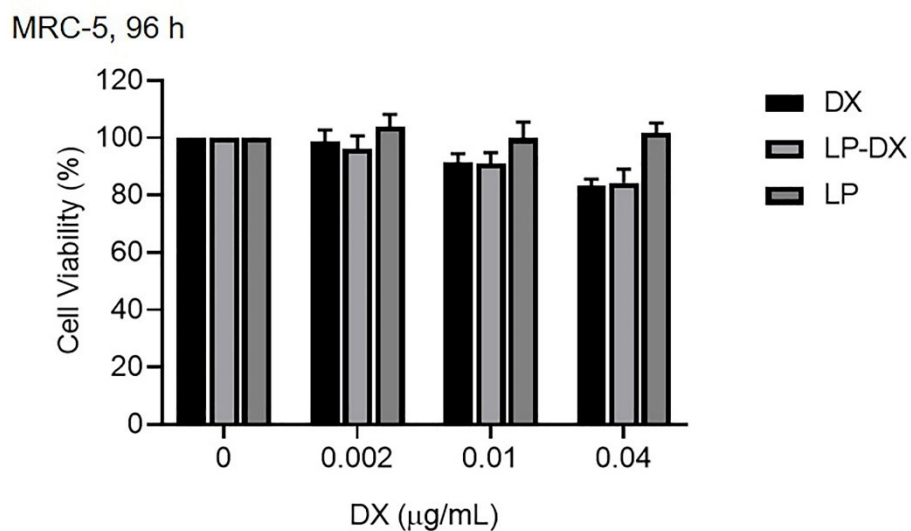

Figure S2. Effect of subtoxic doses of DX and LP-DX on non-cancer cells MRC-5. A total of  $3 \times 10^3$  cells were seeded in 96-well plates and then treated with DX or LP-DX and blank LP at the concentrations indicated in the figure for 96 h. Cell viability of MRC-5 cells was determined by SRB assay.
